# Supplementary material
Source: PubMed Central journal article supplement (PMC5507362)
Supplement: NIHMS870223-supplement-1.pdf [file NIHMS870223-supplement-1.pdf]

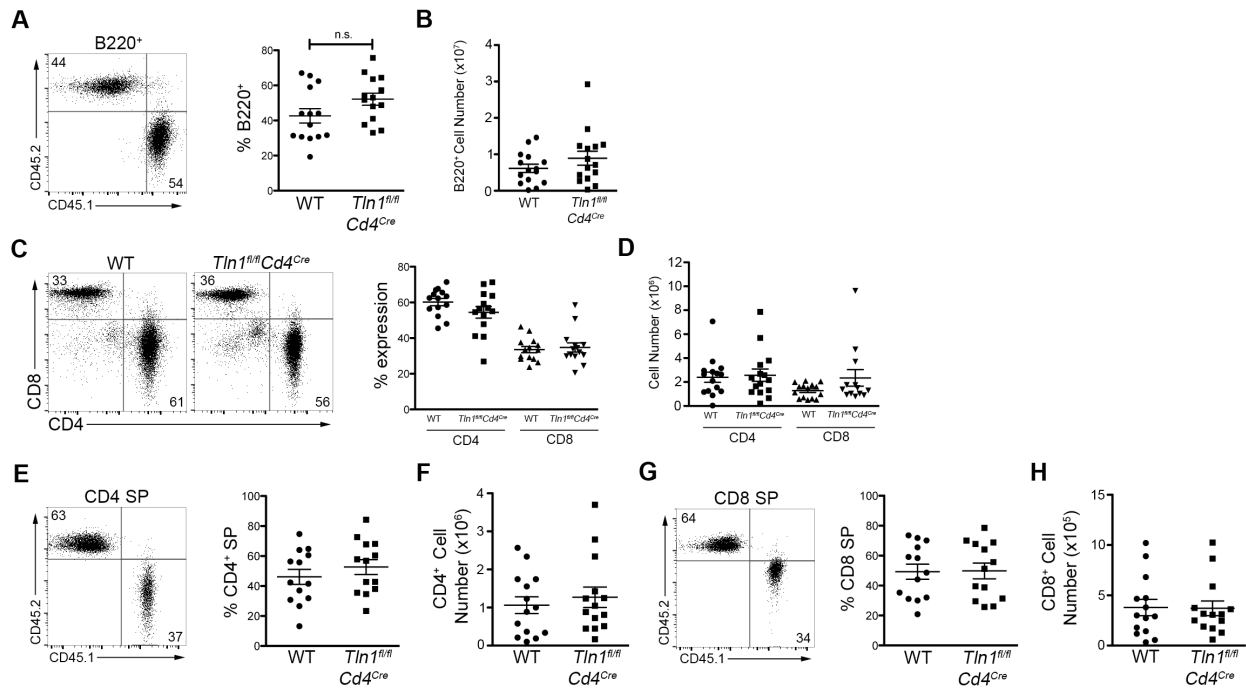

**Supplemental Figure 1. Reconstitution of mixed bone marrow chimeras.** Analysis of mixed bone marrow chimeras reconstituted with bone marrow from *Tln1<sup>fl/fl</sup>* *Cd4<sup>Cre</sup>* mice (CD45.2) and *Tln1<sup>fl/fl</sup>* wild-type mice (CD45.1) (n=14). Mice were analyzed by flow cytometry 8-10 weeks after reconstitution. (A-H) Frequency (A) and absolute number (B) of B220<sup>+</sup> B cells. Frequency (C) and absolute numbers (D) of splenic CD4<sup>+</sup> and CD8<sup>+</sup> T cells. Frequency (E) and absolute numbers (F) of CD4 SP cells isolated from the thymus. Frequency (G) and absolute numbers (H) of CD8 SP cells isolated from the thymus. Data shown are mean ± SEM and are representative of at least 3 independent experiments.

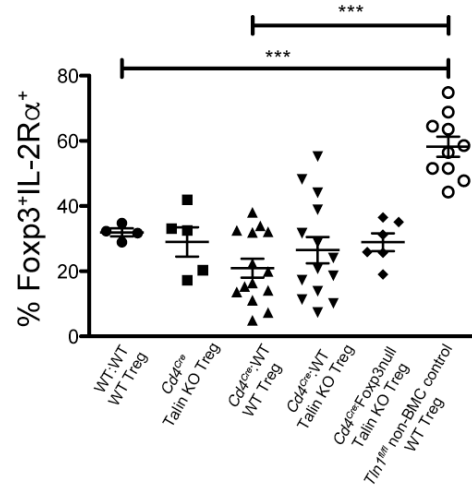

**Supplemental Figure 2. Analysis of IL-2R $\alpha$  expression in bone marrow chimeric mice.** Lethally irradiated RAG1-deficient mice were reconstituted with bone marrow cells from a CD45.2 wild-type donor in combination with cells from a CD45.1 wild-type donor (“WT:WT”, n=4), bone marrow cells from *Cd4<sup>Cre</sup>Tln1<sup>fl/fl</sup>* mice (CD45.2) alone (“*Cd4<sup>Cre</sup>*”, n=5), bone marrow cells from *Cd4<sup>Cre</sup>Tln1<sup>fl/fl</sup>* mice (CD45.2) in combination with wild-type (CD45.1) bone marrow cells (“*Cd4<sup>Cre</sup>:WT*”, n=14), and bone marrow cells from *Cd4<sup>Cre</sup>Tln1<sup>fl/fl</sup>* mice (CD45.2) in combination with Foxp3-deficient deficient (CD45.1) bone marrow cells (“*Cd4<sup>Cre</sup>:Foxp3-null*”, n=5). Mice were analyzed by flow cytometry 8-10 weeks after reconstitution. Expression of IL-2R $\alpha$  in Treg cells from each individual bone marrow chimera is shown; displayed cells were gated on CD4<sup>+</sup>CD45.2<sup>+</sup>Foxp3<sup>+</sup> cells to identify talin-deficient Treg cells in *Cd4<sup>cre</sup>*, *CD4<sup>cre</sup>:WT* and *Cd4<sup>cre</sup>:Foxp3null* mice, and gated on CD4<sup>+</sup>CD45.1<sup>+</sup>Foxp3<sup>+</sup> cells to identify wild-type Treg cells in WT:WT and *Cd4<sup>cre</sup>:WT* chimeras, compared to IL-2R $\alpha$  expression in Treg cells from *Tln1<sup>fl/fl</sup>* control mice, gated on CD4<sup>+</sup>Foxp3<sup>+</sup> cells (n=10). Data shown are mean  $\pm$  SEM. \*, P < 0.05; \*\*, P < 0.01.
